# Supplementary material for: Insights of the Neofusicoccum parvum–Liquidambar styraciflua Interaction and Identification of New Cysteine-Rich Proteins in Both Species
Source: MDPI journal article supplement (doi:10.3390/jof7121027), 2021-11-30
Supplement: s1 [file s1]

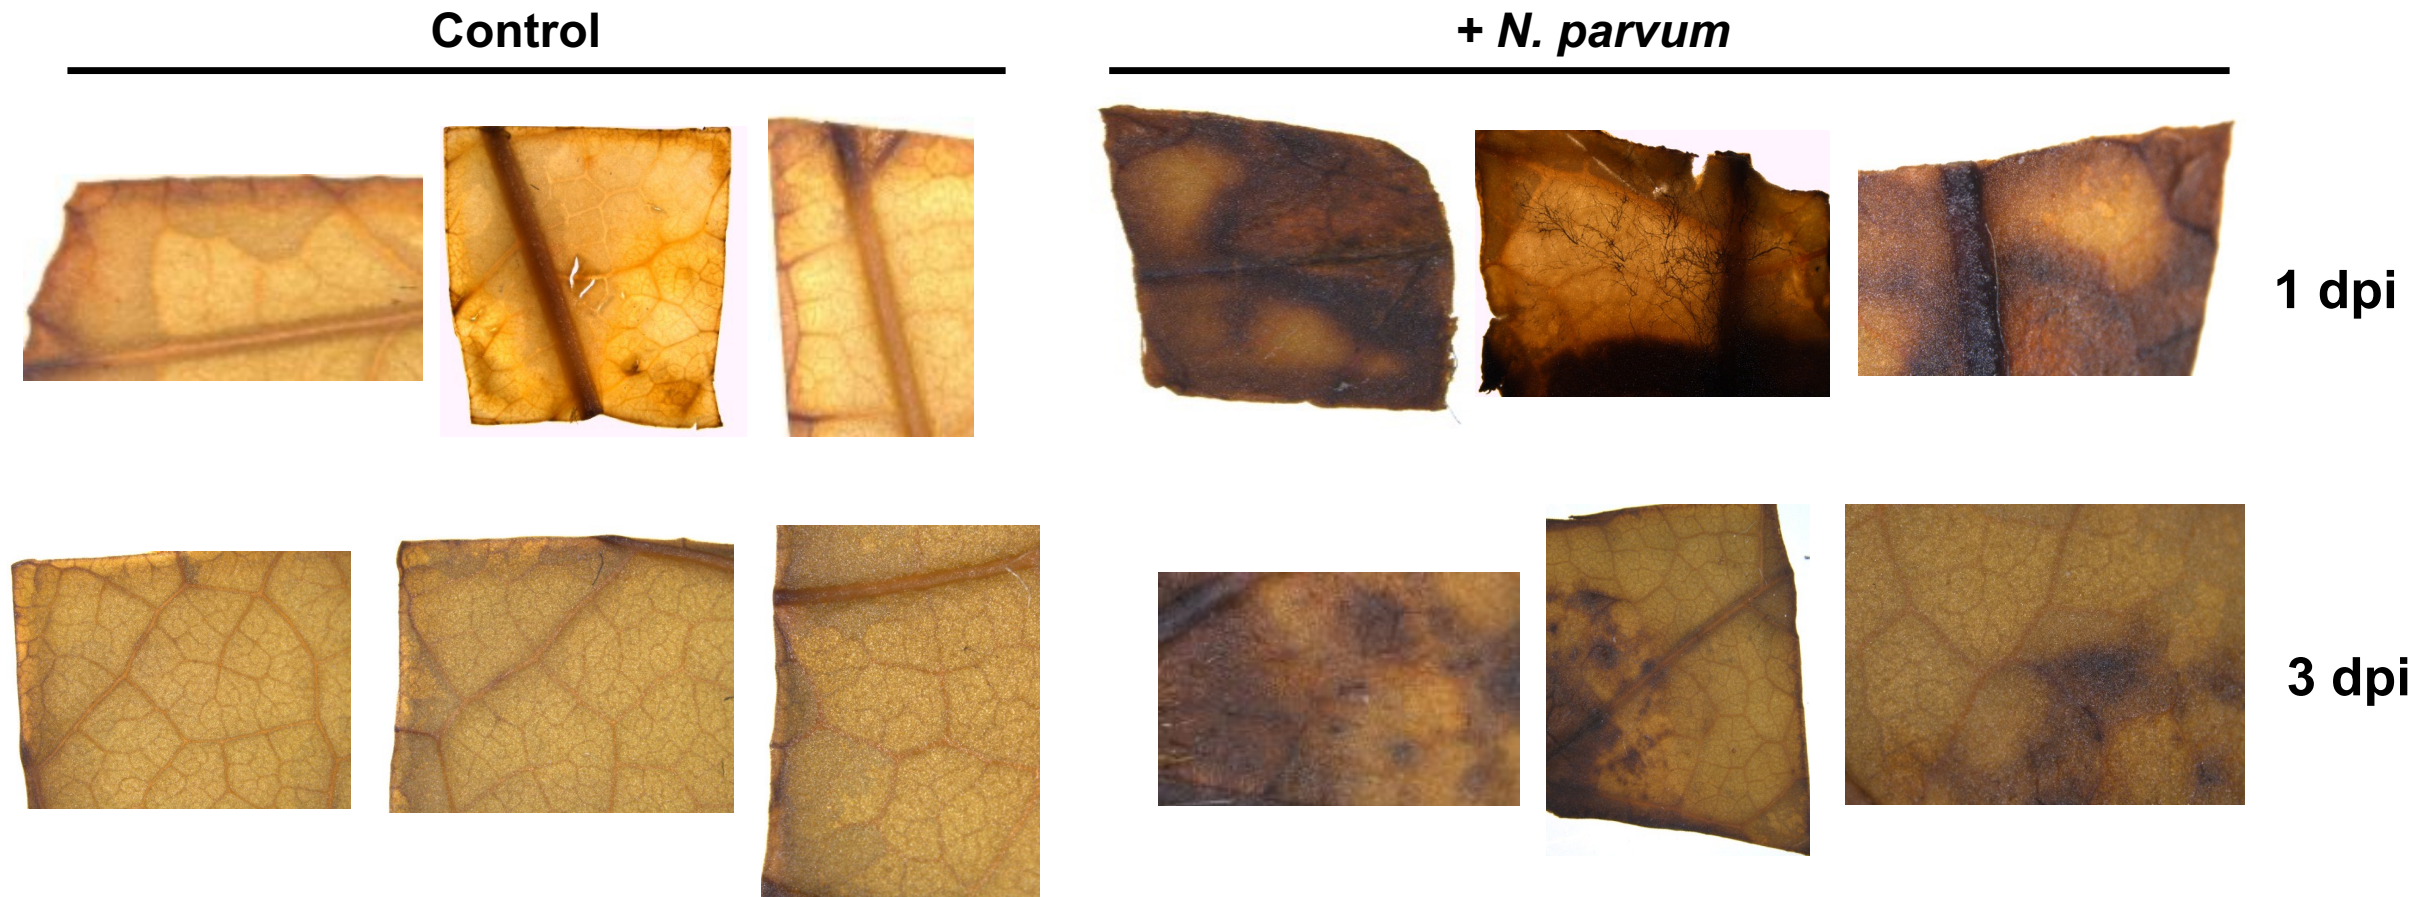

**Figure S3.** Detection of  $\text{H}_2\text{O}_2$  by DAB staining of *L. styraciflua* leaves infected with *N. parvum* at early stages of infection. A stereomicroscope was used to acquire the images.
