# Supplementary material for: Insights of the Neofusicoccum parvum–Liquidambar styraciflua Interaction and Identification of New Cysteine-Rich Proteins in Both Species
Source: MDPI journal article supplement (doi:10.3390/jof7121027), 2021-11-30
Supplement: s1 [file s1]

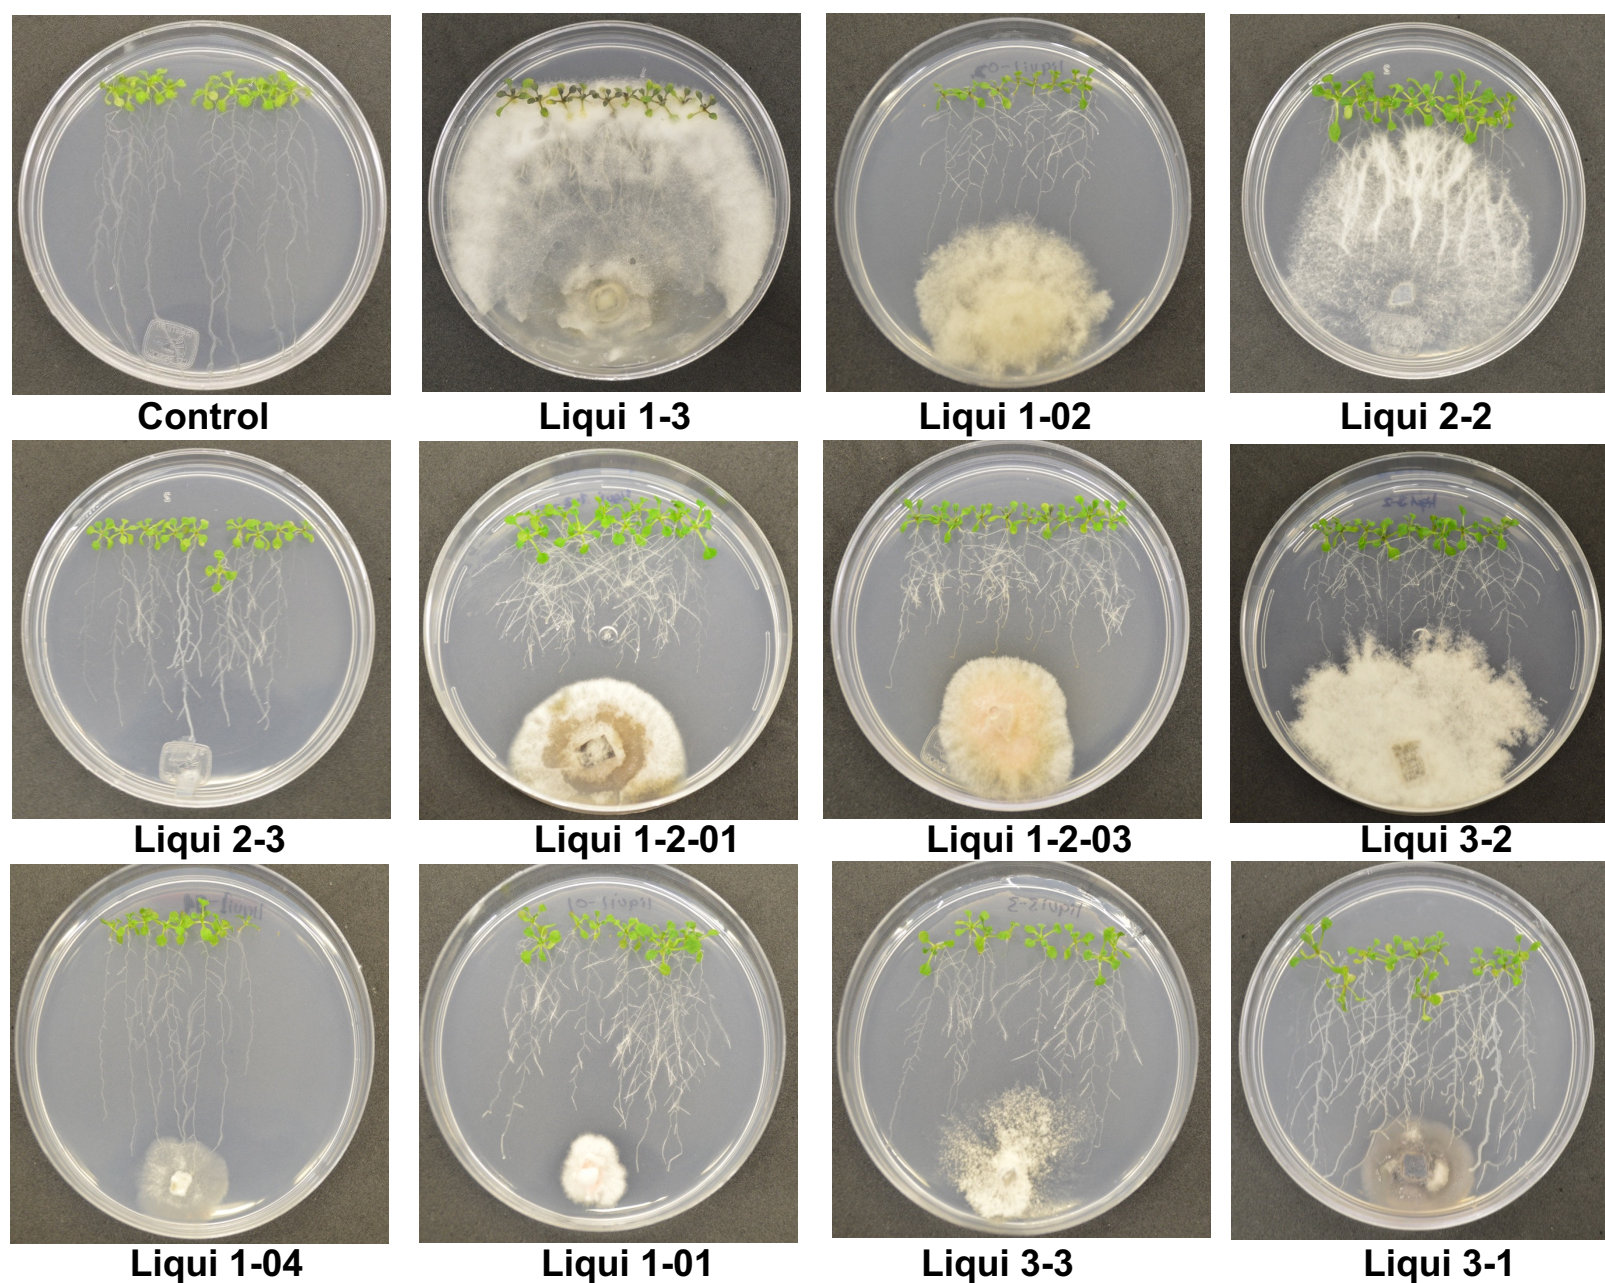

**Figure S1. Pathogenicity screening in *A. thaliana* seedlings.** 14-day-old *A. thaliana* seedlings infected with different fungal isolates. The photograph was taken at 7 dpi, and the data are representative of at least three independent experiments.
