# Supplementary material for: Insights of the Neofusicoccum parvum–Liquidambar styraciflua Interaction and Identification of New Cysteine-Rich Proteins in Both Species
Source: MDPI journal article supplement (doi:10.3390/jof7121027), 2021-11-30
Supplement: s1 [file s1]

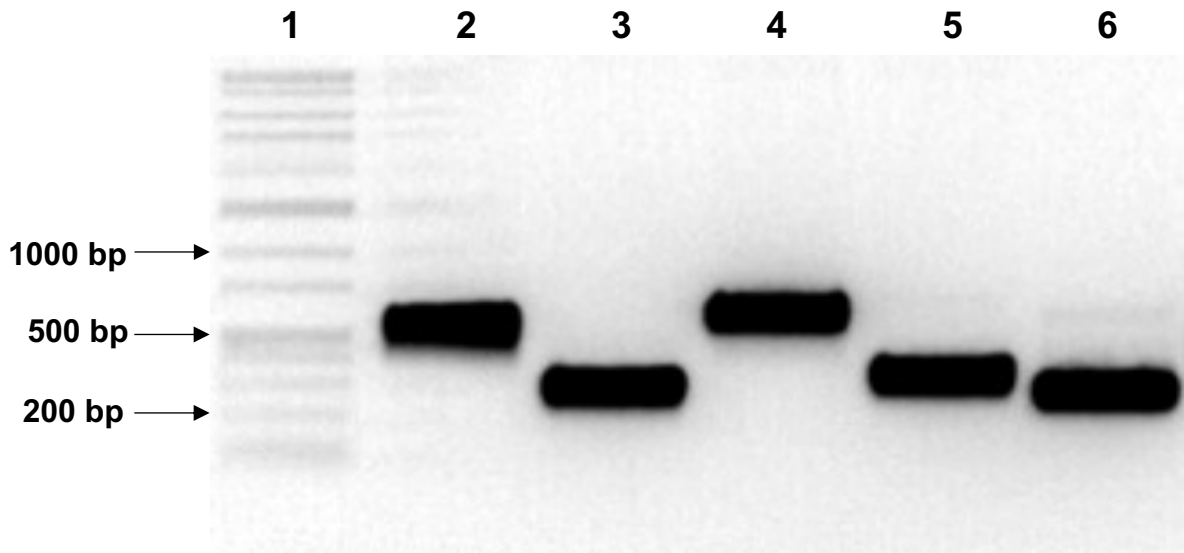

**Figure S2. Molecular identification of the Liqui 1-3 strain.** Agarose gel electrophoresis and PCR product bands. Lane 1: ladder, the primers used are listed; lane 2: Bt2a and Bt2b; lane 3: Np304-F and Np304-R; lane 4: RPB2bot7F and RPB2bot7F; lane 5: Bot15 and Bot16 and lane 6: EF1-728F and EF-BR.
