# Supplementary material for: Insights of the Neofusicoccum parvum–Liquidambar styraciflua Interaction and Identification of New Cysteine-Rich Proteins in Both Species
Source: MDPI journal article supplement (doi:10.3390/jof7121027), 2021-11-30
Supplement: s1 [file s1]

| Table S1. Primers used in this study for the molecular identification of Liqui 1-3 strain and qRT-PCR experiments. |           |                             |           |                           |
|--------------------------------------------------------------------------------------------------------------------|-----------|-----------------------------|-----------|---------------------------|
| Target gene                                                                                                        | Primers   | Primer sequence (5` - 3`)   | Size (bp) | References                |
| b-tubulin                                                                                                          | Bt2a      | GGT AACCAAATCGGTGCTGCTTTC   | 450-500   | Glass and Donaldson, 1995 |
|                                                                                                                    | Bt2b      | ACCCTCAGTGTAGTGACCCTTGGC    |           |                           |
| ITS                                                                                                                | Np304-F   | TGAACTTCGCAGTCTGAA          | 304       | Cheng-nang X et al. 2016  |
|                                                                                                                    | Np304-R   | CTCCAAAGCGAGGTGTTT          |           |                           |
| RPB2                                                                                                               | RPB2bot6F | GGTAGCGACGTCACTCCC          | 500       | Sakalidis et al. 2011     |
|                                                                                                                    | RPB2bot7F | GGATGGATCTCGCAATGCG         |           |                           |
| Unknown locus containing microsatellite                                                                            | Bot15     | CTGACTTGTGACGCCGGCTC        | 350       | Slippers et al. 2004      |
|                                                                                                                    | Bot16     | CAACCTGCTCAGCAAGCGAC        |           |                           |
| EF-1a                                                                                                              | EF1-728F  | CATCGAGAAAGTTCGAGAAGG       | 300       | Carbone et al. 1999       |
|                                                                                                                    | EF-BR     | CRA TGG GTG ATA CCA RCG CTC |           | Sakalidis et al. 2011     |
| NpCysP1                                                                                                            | For       | GGCTTCCAAGAAGGAGAAGAG       | 108       |                           |
|                                                                                                                    | Rev       | CAAACAAGGCCAATGGAAGAG       |           |                           |
| NpCysP2                                                                                                            | For       | CAACACTACCGAGTCCTTCTG       | 121       |                           |
|                                                                                                                    | Rev       | TCGGACGTCCAGGTCTTAT         |           |                           |
| NpCysP3                                                                                                            | For       | CGGCGGTGTTATGAGTAAGT        | 84        |                           |
|                                                                                                                    | Rev       | GTGTTGTCCGCTAGGATAGAAG      |           |                           |
| NpCysP4                                                                                                            | For       | ATCTGCGCCAACAAGGAA          | 98        |                           |
|                                                                                                                    | Rev       | TTCTGCGCGAAGTTGATGA         |           |                           |
| NpCysP5                                                                                                            | For       | TCTCCCTGGCCTCTGTT           | 75        |                           |
|                                                                                                                    | Rev       | TGGTGACGAAGCAGTTGAG         |           |                           |
| LsCysP1                                                                                                            | For       | GCAAACCTCTGGAATGATGGA       | 118       |                           |
|                                                                                                                    | Rev       | AAACAAACGGAGATACGGTCA       |           |                           |
| LsCysP2                                                                                                            | For       | TTATGCTGCCGCTGAACTTG        | 99        |                           |
|                                                                                                                    | Rev       | CCTTTGCACGAGACTGCCTA        |           |                           |
| LsCysP3                                                                                                            | For       | CACCACACAAGCAAGGTTAAG       | 121       |                           |
|                                                                                                                    | Rev       | CCCTTTCCACTCACAGATCAA       |           |                           |
| LsCysP4                                                                                                            | For       | ACAAGCAAGGGACAGGAAGG        | 101       |                           |
|                                                                                                                    | Rev       | TTGGAAGGACTGGGAAGGAA        |           |                           |
| LsCysP5                                                                                                            | For       | CTTGCTTCACTCCTCGTTTCT       | 104       |                           |
|                                                                                                                    | Rev       | GAACTCTTGGGAGGAGAACTTG      |           |                           |
