# Supplementary material for: Insights of the Neofusicoccum parvum–Liquidambar styraciflua Interaction and Identification of New Cysteine-Rich Proteins in Both Species
Source: MDPI journal article supplement (doi:10.3390/jof7121027), 2021-11-30
Supplement: s1 [file s1]

| Table S2. CysRP nucleotide sequences. |                                                                                                    |             |                                                                                                                                                                                                                                                                                                                                                                                                                                                                                                                                                                                                                          |                        |
|---------------------------------------|----------------------------------------------------------------------------------------------------|-------------|--------------------------------------------------------------------------------------------------------------------------------------------------------------------------------------------------------------------------------------------------------------------------------------------------------------------------------------------------------------------------------------------------------------------------------------------------------------------------------------------------------------------------------------------------------------------------------------------------------------------------|------------------------|
| Assigned name                         | Target name                                                                                        | Length cDNA | Coding sequence                                                                                                                                                                                                                                                                                                                                                                                                                                                                                                                                                                                                          | Length coding sequence |
| LsCysRP1                              | Liquidambar_styraciflua_01052015_comp30850_c0_seq1                                                 | 1326        | <u>ATGG</u> ACCGGATGAGCAGCATGCGCTCTGTATTTTGGATTTTGGTCTCCTTTGGAACAAACGCAGCTGTCAGTGAGTTGATAAATGTTGCCTGCCCCAGAGTGCAGAAGTGGACCATTGCATGTGTAATTGTAGGGCAATAGACGATGCTTGGAAATGTGATTGGCATAATGACCTGCGGATGTTTGGCTTGAAAAC TGAAATACAAAGGCCTCAAAATGAAGTGTGTTGCAATTGGTAACCAAGTTGTATTATATACATTTGGGATCTGTGTTTCTCACAGGAAAAGTCGGAACCTAAGATGA                                                                                                                                                                                                                                                                                                 | 303                    |
| LsCysRP2                              | Liquidambar_styraciflua_01052015_comp28855_c0_seq1                                                 | 1868        | <u>ATGGG</u> CATGGCATTGTCTGCCAGTAAGTGGGTGTCAGCAGCAGATAACTGCTGCAACCTCAAAGTTTGATGGCAAGGGAACAAAGTGGGGTTGGTGCTTGTTCACCAAACCCTGCCCTTGCCAGCACCAATGAAGAAGCTCTGTGTCATTAGCTCTTATGGTTACTGCAATAGGTTTCGGTTTAAGGAATTGTCCTACCAACCATTTGGTTGCTAAGGCAAACTATTCTTGGCTCAGCTGCATTGAGGTCATCTTTGCCATTCATACAGCTCCGCTGACCTGGGGTGGTTAGAGATGGTCAAACCTTAA                                                                                                                                                                                                                                                                                            | 312                    |
| LsCysRP3                              | Liquidambar_styraciflua_01052015_comp18453_c1_seq1                                                 | 560         | <u>ATGG</u> CTAGCTCAGGAATCCTTAACCTTGCTTGTGTGGTGCTCGTCAGCATGGTGTTGGTTGCACCCCATGCTGAAGCTGCCATGACATGGTTCAGGTGACGAGTAGCGTGTCCCCATGCCTCCCCCTACCTGAAGGGTGCTAGGCCATTGTCAGCCAGGCTGCTGCAATGGGATCAGGTCCTCAACAGCGCGGCTAAGACCACACGGACCGCCAGGCTGCTTGTAGGTGCTTGTCAGCAGGCTGCTCTAGCATCTCTGATCAATTTGGGTCTTGCATCTGGCCTTCTGGCAAAATGTGGTATCAGCATT                                                                                                                                                                                                                                                                                            | 312                    |
| LsCysRP4                              | Liquidambar_styraciflua_01052015_comp37785_c0_seq1                                                 | 1655        | <u>ATGGG</u> TTTACAGGAATGTCTCCAATGAGCTTCTATGTGCTTGGTGCTGCGGTCAACCAACTCATCATCTTGAAGCATTAGTCAGTTGGACAGCAGCGTTGCTTCAATCATTAAGCTCAAAGTTGTGTGAGGACACAGATTTTTTACTAATAGTTTGTATCTGTAGAAGTATGGATCATTCTTTGTACAAATATTTGTATCATAAGACATTAAAGAAAGACCAACATCGGCAAAGAAGCTGCACCTAAGAGGGCTAAGCCTATGATGATTGCTTGTGTTGTAGAGATGCTGTGATAGATTTGCAGCTTGA                                                                                                                                                                                                                                                                                            | 315                    |
| LsCysRP5                              | Liquidambar_styraciflua_01052015_comp31840_c0_seq3                                                 | 765         | <u>ATGG</u> CCATCTACAAGGCTCTTCTTGCTTCACTCCTCGTTTCTCTTTTGTCTCCATCTTGTGTAGCTGATGGAAATGGGGATGCAGACAACGGATGCTGCAACAAGTTCTCTCCCAAGAGTTCTCCCCCAAGAAAATTGATTGTGGAGGAGCTTGCTCCTCTAGGTGCCAGTTATCGTTCGAGGCCAAACCTATGCAAGAGGGCGTGTGGGACTTGCTGTGCCGTTGCAACTGCGTTCTCCGGGTACTTCCGGGAATGAAGATGTCTGTCCCTGCTACGCCAGCATGACCACCAAGCGCGGAAGGCCAAAGTGCCCTTGA                                                                                                                                                                                                                                                                                  | 324                    |
| NpCysRP1                              | Neofusicoccum parvum UCRNP2 chromosome Unknown NP2_03_scaffold_347, whole genome shotgun sequence  | KB915985.1  | <u>ATG</u> CAGTTCAAGTTCGCCCTTGCTCCTCTTACC GCCCTGGCCCTTGCCGCGCCCGGCATCGATCTCGAGAAGAGGTGCACCGCTAACGGCGGCTCTTGCACCAGCTGAGCCAGTGCTGCAGTGGCAACTGCGAGTACGACTCTTCATCGGTCTTGTTGTCGAAGGCGGGCTTCCAGAAGGAGAAGAGGTGCACGGCCAACGGCGGCGCCTGCCTCAGTTGGCTCAGTGCTGCAGTGGTAACCTGCGAGTACGACTCTTCCATTGGCCTTGTTTGAAGCCCTTAG                                                                                                                                                                                                                                                                                                                    | 288                    |
| NpCysRP2                              | Neofusicoccum parvum UCRNP2 chromosome Unknown NP2_03_scaffold_285, whole genome shotgun sequence  | KB915923.1  | <u>ATG</u> CGACCACTGTACAGCCACCTTGACACACCTACCTCCCTCTTCTCCATCCTCCTCGACCCCGCCCGCTCTGCACAGGACGACCAGCTCCCCGCTGCTACTACCCGACGGCAGCTCGCGTCCAACGACTACGCTCGCGGCTCAACACTACCGAGTCTTCTTGCTGCACGACCAACGTACATGCCTCGACAACAAGATCTGCCAGGTGCTGGCGCCACGCAGTACGAGTACAACCGCGGCACCTGCACCGATAAGACCTGGACGTCCGACGAGTGC CCAAAGTTCTGTCAAGCGCAATCGCCGTCTGACGGCTCGGGGTGATCAGACCTGTATACTGA                                                                                                                                                                                                                                                              | 351                    |
| NpCysRP3                              | Neofusicoccum parvum UCRNP2 chromosome Unknown NP2_03_scaffold_45, whole genome shotgun sequence   | KB915683.1  | <u>ATG</u> CGTTTCTCGTTTGCTATCTCCGTGCGCGCCACGGCCCTTCTCTACCGGCCTTGCCGCCTCGCAGCTAAGTGTGCCTGCAGATTGCCCTGTGACCGCGGAACCAACGATGCCGCTACTGTGCGATGTGCTCCTACGTCTCGCGGTGTATATAGTAAGTCCAACGTGGCGGTGCTAAAAGCAAGTTGCCCTGCTGCTGCTGCTGCTTCTATCTGCAAGCAACCATCATCTACGGGCGTTCTTTACCCCGGCAAACTAGTCCAGGGCAATTGGCGGCCACGAGCTCGGCGGTGACGTGTCTACGAGGCTTGCCGTAGCCAGAAGTGCGGTGATACCTACTGCCAGGACTCCAATTGCGCTTAA                                                                                                                                                                                                                                      | 366                    |
| NpCysRP4                              | Neofusicoccum parvum UCRNP2 chromosome Unknown NP2_03_scaffold_259, whole genome shotgun sequence  | KB915897.1  | <u>ATG</u> CGCGTCTCCGCATTTGCCGCCATCCTCGGCTATAGCAGCCTCGCTCTTGCTCAGACACAGCTGCTCCCTACCTGCGCTCAAAAATGCGTTGGCACCGATTTCGGCGGGTGTCTCCGGTTGATGTCAAGTGCATCTGCGCCGAACAAAGAACTGCTACGGCCTTGCGTGCTGCTGACCGGTGCAATGCGCGGACAGGACCGCTCATCAAGCTTCGCGAGAACCTGTGCAAGCCGACGGCGTGACCGACCTCCCCACGACGGCCACCTGCGCGTCCGGCGCTCTTCGGCCACCAAGCTCTGCCTCTCCGGCACCGCGTCCACCATCGTCCAGCGCCGCCAGCGCTTCCGCTTCGGCGACCGGCTCCGCTGCCAGCTCTGCCTCTCTCGCTGCTGCTGGTTGCGTTCAGCGCGCTGCGCGCAGCAGTGCAGCTGCGCGCTTCTGCTCTGCTGCCACCACTGCCGGCAGCGCGCGGGTTCTGTGCCAGGGCAACGCGCGGGGATGGGATTTCGGTCTGTGCTTGTGTTGCTGCTGGGCGCGCTTAG                                                | 564                    |
| NpCysRP5                              | Neofusicoccum parvum UCRNP2 chromosome Unknown NP2_03_scaffold_1007, whole genome shotgun sequence | KB916645.1  | <u>ATGA</u> AGACCTCCTTCGCGCGGTTGCCTTCTCCCTGGCCTCTGTTGCCTACTCCCAGAACATCTCGGACCTCCCAGCTGCTCGCTCAACTGCTTCGTCAACACCTCGGCAGTGACGGCTGCTCGTCTACCGACTTCGAGTGCCACTGCAAGTCCCCGGCCTGACCGACGAGATACTCCCTGCGTCCAGAAGGCTTGCTCCGCGCGCAGCAGACAGACGTTGCCGAGCAGCTCAAGGCCCTGTGCGCCAGTACGGCTGACATCTCGGTCCTGAGGCGCTCCTCGACGCGCAGCTCCGTCCTCGACCGCGCCACAGCGCTCCGGCCTCGTCTCTTGCTGCGGCCACACGCGGGCTTCGTTCGGTTCGCTTCCAGCGTTCGCTTCCAGCGCCAGCGCTCTGCCACCAGCACCGAGACTGCCTCTCCCTCGGCCACTGACGTGCTCATCTCCACCCGGTCGCCACCCGACCAACCCCGCGCTTCCACTCCCGCGGCTCCACCCGACTCCCTCTCAGTTCACGGGTGCCGCTGGCAAGACTGGTGTGTTGGCGCGTTGTCCGTTTCGCCCGCGCGTCTGCTGCTGTTGCCGCCCTTAA | 615                    |
