# Supplementary material for: Insights of the Neofusicoccum parvum–Liquidambar styraciflua Interaction and Identification of New Cysteine-Rich Proteins in Both Species
Source: MDPI journal article supplement (doi:10.3390/jof7121027), 2021-11-30
Supplement: s1 [file s1]

| Table S3. Predicted disulfide bonds for CysRPs. |                 |                                                 |                                                                 |                                                                   |                                                                 |                                                                |                                                                |
|-------------------------------------------------|-----------------|-------------------------------------------------|-----------------------------------------------------------------|-------------------------------------------------------------------|-----------------------------------------------------------------|----------------------------------------------------------------|----------------------------------------------------------------|
| Assigned name                                   | Total cysteines | Cysteine position in the amino acid sequence    | Cyscon <sup>1</sup>                                             | DISULFIND <sup>2</sup>                                            | DiANNA <sup>3</sup>                                             | CYS_REC <sup>4</sup>                                           | SCRATCH <sup>5</sup>                                           |
| LsCysRP1                                        | 7               | 31, 40, 42, 44, 76, 77, 83                      | 31-83<br>40-77<br>44-76                                         | 40 - 76<br>42 - 77<br>44 - 83                                     | 40 - 76<br>42 - 44<br>77 - 83                                   | 40-76<br>42-83<br>44-77                                        | 77 - 83<br>31 - 40<br>44 - 76                                  |
| LsCysRP2                                        | 9               | 34, 35, 39, 41, 49, 50, 57, 81                  | 34 - 41<br>35 - 50<br>49 - 57                                   | 34 - 41<br>35 - 39<br>49 - 81<br>50 - 57                          | 34 - 57<br>35 - 49<br>39 - 41<br>50 - 81                        | 34-39<br>41-49<br>50-60                                        | 35 - 49<br>31 - 57<br>34 - 50                                  |
| LsCysRP3                                        | 8               | 30, 40, 54, 55, 75, 77, 100                     | 30 - 77<br>40 - 54<br>75 - 100                                  | 40 - 55<br>54 - 75<br>77 - 100                                    | 30 - 77<br>40 - 54<br>55 - 100                                  | 30 - 54<br>40 - 77<br>55 - 100                                 | 54 - 75<br>55 - 100<br>11 - 30                                 |
| LsCysRP4                                        | 4               | 13, 16, 17, 93                                  | ---                                                             | ---                                                               | ---                                                             | ---                                                            | ---                                                            |
| LsCysRP5                                        | 12              | 49, 53, 57, 66, 70, 73, 74, 77, 79, 91, 93, 106 | 49 - 77<br>53 - 70<br>57 - 66<br>73 - 93<br>74 - 106<br>79 - 91 | Connectivity<br>Pattern can be<br>predicted for<br>up to 5 bonds. | 49 - 93<br>53 - 73<br>57 - 66<br>70 - 106<br>74 - 79<br>77 - 91 | 49 - 74<br>53 - 73<br>57 - 77<br>66 - 79<br>70 - 91            | 49 - 53<br>77 - 93<br>74 -106<br>79 - 91<br>57 - 70            |
| NpCysRP1                                        | 12              | 27, 34, 40, 41, 45, 55, 65, 72, 78, 79, 83, 93  | 27 - 55<br>34 - 83<br>40 - 72<br>41 - 78<br>45 - 79<br>79 - 93  | Connectivity<br>Pattern can be<br>predicted for<br>up to 5 bonds. | Many<br>posibel<br>connectivity                                 | 27 - 40<br>34 - 78<br>41 - 79<br>45 - 55<br>65 - 83<br>72 - 93 | 34 - 45<br>78 - 93<br>27 - 41<br>40 - 55<br>72 - 83<br>65 - 79 |
| NpCysRP2                                        | 9               | 35, 49, 58, 59, 65, 71, 86, 96, 100             | 35 - 49<br>59 - 86<br>65 - 71<br>96 - 100                       | 49 - 86<br>58 - 96<br>59 - 65<br>71 - 100                         | 35 - 59<br>58 - 71<br>65 - 100<br>86 - 96                       | 49 - 71<br>58 - 100<br>59 - 86<br>65 - 96                      | 49 - 65<br>86 - 96<br>58 - 71<br>35 - 59                       |
| NpCysRP3                                        | 8               | 26, 28, 45, 88, 105, 110, 115, 120              | 28 - 105<br>45 - 88<br>110 - 120                                | 26 - 120<br>28 - 45<br>88 - 115<br>105 - 110                      | 26 - 28<br>45 - 120<br>88 - 110<br>105 - 115                    | 28 - 105<br>45 - 115<br>88 - 110                               | 88 - 110<br>105 - 115<br>28 - 45                               |
| NpCysRP4                                        | 11              | 26,30,38,45,47,58,59,64, 80, 94, 166            | 26 - 45<br>30 - 57<br>38 - 58<br>59 - 80<br>94 - 166            | 26 - 30<br>38 - 166<br>45 -58<br>47 -64<br>59 -80                 | 26 - 59<br>38 - 166<br>45 - 80<br>47 - 58<br>64 - 94            | 26 - 45<br>30 - 59<br>38 - 58<br>64 - 94<br>80 - 166           | 30 - 47<br>94 - 167<br>26 - 45<br>38 - 64<br>59 - 80           |
| NpCysRP5                                        | 8               | 27, 31, 41, 49, 51, 63, 68, 84                  | 27 - 63<br>41 - 51<br>68 - 84                                   | 27 - 63<br>31 - 68<br>41 - 84<br>49 - 51                          | 27 - 49<br>31 - 68<br>41 - 63<br>51 - 84                        | 27-63<br>31-41<br>51-68                                        | 51 - 63<br>68 - 84<br>41 - 49                                  |

<sup>1</sup>Jing Yang<sup>^</sup>, Bao-Ji He<sup>^</sup>, Richard Jang, Yang Zhang, and Hong-Bin Shen, Bioinformatics, 2015, 31: 3773-3781.

<sup>2</sup>A. Ceroni, A. Passerini, A. Vullo and P. Frasconi, Nucleic Acids Research, 2006, 34(Web Server issue):W177–W181.

<sup>3</sup>F. Ferre and P. Clote, Nucleic Acids Res. 2006 Jul 1; 34(Web Server issue): W182–W185.

<sup>4</sup>Softberry Web Site [http://www.softberry.com/berry.phtml?topic=cys\\_rec&group=programs&subgroup=propt](http://www.softberry.com/berry.phtml?topic=cys_rec&group=programs&subgroup=propt)

<sup>5</sup>Scratch Proteina Prediction <http://scratch.proteomics.ics.uci.edu/index.html>
